# Supplementary material
Source: PubMed Central journal article supplement (PMC9905707)

**Supplemental Table 1.** Univariable and multivariable predictors of progression to cirrhosis among patients with baseline bridging (F3) fibrosis secondary to non-alcoholic steatohepatitis

|                                                     | Univariable           |         | Multivariable         |         |
|-----------------------------------------------------|-----------------------|---------|-----------------------|---------|
|                                                     | Hazard Ratio (95% CI) | p-value | Hazard Ratio (95% CI) | p-value |
| Age, per yr                                         | 1.01 (0.99, 1.03)     | 0.3483  | 1.01 (0.99, 1.03)     | 0.4083  |
| Sex (Female vs. Male)                               | 0.98 (0.67, 1.45)     | 0.9355  | 1.12 (0.75, 1.66)     | 0.5879  |
| Ethnicity (Non-hispanic/Latino vs. Hispanic/Latino) | 0.68 (0.41, 1.12)     | 0.1320  | 0.63 (0.38, 1.04)     | 0.0714  |
| BMI, per kg/m <sup>2</sup>                          | 1.02 (0.99, 1.05)     | 0.2178  | 1.00 (0.97, 1.03)     | 0.8561  |
| LS by VCTE $\geq$ 16.6 kPa                          | 3.86 (2.61, 5.72)     | <0.001  | 3.99 (2.66, 5.98)     | <.0001  |

BMI, body mass index; LS by VCTE, liver stiffness by vibration-controlled transient elastography.

**Supplemental Table 2.** Univariable and multivariable predictors of progression to cirrhosis among patients with baseline bridging (F3) fibrosis secondary to non-alcoholic steatohepatitis

|                                                        | Univariable              |         | Multivariable            |         |
|--------------------------------------------------------|--------------------------|---------|--------------------------|---------|
|                                                        | Hazard Ratio<br>(95% CI) | p-value | Hazard Ratio<br>(95% CI) | p-value |
| Baseline LS by VCTE $\geq$ 16.6 kPa<br>vs. <16.6 kPa   | 3.86 (2.61, 5.72)        | <0.001  | 4.26 (2.83, 6.40)        | <0.001  |
| Age, per yr                                            | 1.01 (0.99, 1.03)        | 0.3483  | 1.01 (0.99, 1.03)        | 0.4092  |
| Sex (Female vs. Male)                                  | 0.98 (0.67, 1.45)        | 0.9355  | 1.08 (0.73, 1.61)        | 0.6871  |
| Ethnicity (Non-hispanic/Latino vs.<br>Hispanic/Latino) | 0.68 (0.41, 1.12)        | 0.1320  | 0.65 (0.39, 1.07)        | 0.0927  |
| BMI, per kg/m <sup>2</sup>                             | 1.02 (0.99, 1.05)        | 0.2178  | 0.99 (0.96, 1.02)        | 0.6179  |
| $\geq$ 20% increase in LS by VCTE vs<br><20% increase  | 1.59 (0.97, 2.59)        | 0.0638  | 1.98 (1.20, 3.26)        | 0.0076  |

BMI, body mass index; LS by VCTE, liver stiffness by vibration-controlled transient elastography.

**Supplemental Table 3.** Baseline demographics and clinical characteristics of the subgroup of patients with sufficient data for determination of the Agile 3+ and 4 scores

|                           |                                          | <b>Bridging Fibrosis (F3)<br/>n=629</b> | <b>Compensated Cirrhosis (F4)<br/>n=701</b> |
|---------------------------|------------------------------------------|-----------------------------------------|---------------------------------------------|
| <b>Demographics</b>       | Age, y                                   | 58 (51, 64)                             | 59 (54, 65)                                 |
|                           | Women, n (%)                             | 350 (56)                                | 442 (63)                                    |
|                           | Diabetes, n (%)                          | 444 (71)                                | 531 (76)                                    |
| <b>Liver biochemistry</b> | ALT, U/L                                 | 53 (36, 80)                             | 43 (32, 61)                                 |
|                           | AST, U/L                                 | 46 (33, 65)                             | 45 (34, 61)                                 |
|                           | AST/ALT ratio                            | 0.86 (0.72, 1.04)                       | 1.02 (0.84, 1.24)                           |
|                           | Platelets, 10 <sup>3</sup> /μL           | 206 (166, 256)                          | 161 (125, 206)                              |
| <b>Liver histology</b>    | NAS ≥4, n (%)                            | 594 (94)                                | 662 (95) <sup>†</sup>                       |
|                           | Steatosis Grades 2–3, n (%)              | 53 (8)                                  | 33 (5) <sup>†</sup>                         |
|                           | Lobular inflammation Grade 3, n (%)      | 317 (50)                                | 377 (54) <sup>†</sup>                       |
|                           | Hepatocellular ballooning Grade 2, n (%) | 489 (78)                                | 570 (82) <sup>†</sup>                       |
| <b>Biopsy quality</b>     | Length, cm                               | 2.2 (1.6, 3.0)                          | 2.0 (1.5, 2.8)                              |
|                           | Length ≥2 cm, n (%)                      | 383 (61)                                | 388 (55)                                    |
| <b>Noninvasive tests</b>  | NFS                                      | -0.192 (-1.016, 0.500)                  | 0.619 (-0.212, 1.493)                       |
|                           | FIB-4                                    | 1.68 (1.23, 2.50)                       | 2.49 (1.73, 3.49)                           |
|                           | ELF                                      | 9.94 (9.34, 10.61)                      | 10.60 (9.97, 11.27)                         |
|                           | LS by VCTE, kPa                          | 12.7 (9.7, 17.3)                        | 21.1 (14.3, 28.9)                           |
|                           | Agile 3+                                 | 0.76 (0.53, 0.89)                       | 0.95 (0.86, 0.98)                           |
|                           | Agile 4                                  | 0.20 (0.08, 0.39)                       | 0.63 (0.34, 0.80)                           |

Data are median (interquartile range) or n/n (%).

ALT, alanine aminotransferase; αSMA, α-smooth muscle actin; BMI, body mass index; ELF, Enhanced Liver Fibrosis score (Siemens Healthcare GmbH, Erlangen Germany); FIB-4, fibrosis-4 index; GGT, γ-glutamyltransferase; LS by VCTE, liver stiffness by vibration-controlled transient elastography; NAFLD Activity Score, NAS.

<sup>†</sup> Total n=699.

**Supplemental Table 4.** Univariable and multivariable predictors of progression to cirrhosis among patients with bridging (F3) fibrosis secondary to non-alcoholic steatohepatitis

|                                                     | Univariable           |         | Multivariable         |         |
|-----------------------------------------------------|-----------------------|---------|-----------------------|---------|
|                                                     | Hazard Ratio (95% CI) | p-value | Hazard Ratio (95% CI) | p-value |
| Age, per yr                                         | 1.01 (0.99, 1.03)     | 0.5227  | 0.99 (0.97, 1.01)     | 0.3738  |
| Sex (Female vs. Male)                               | 0.93 (0.62, 1.39)     | 0.7270  | 0.84 (0.56, 1.26)     | 0.3958  |
| Ethnicity (Non-hispanic/Latino vs. Hispanic/Latino) | 0.68 (0.40, 1.13)     | 0.1351  | 0.61 (0.36, 1.03)     | 0.0619  |
| BMI, per kg/m <sup>2</sup>                          | 1.02 (0.99, 1.05)     | 0.1715  | 1.00 (0.97, 1.03)     | 0.8734  |
| Agile 3+ score $\geq$ 0.90                          | 4.34 (2.89, 6.50)     | <.0001  | 4.75 (3.07, 7.34)     | <.0001  |

BMI, body mass index.

**Supplemental Table 5.** Performance of liver stiffness by vibration-controlled transient elastography versus the Agile scores for predicting disease progression\*

|                      | <b>Progression to Cirrhosis (F4) in Patients with Bridging Fibrosis (F3) (n=629)</b> |                   | <b>Liver-Related Clinical Events Among Patients with Cirrhosis (F4) (n=701)</b> |                   |
|----------------------|--------------------------------------------------------------------------------------|-------------------|---------------------------------------------------------------------------------|-------------------|
|                      | <b>Liver stiffness by VCTE</b>                                                       | <b>Agile 3+</b>   | <b>Liver stiffness by VCTE</b>                                                  | <b>Agile 4</b>    |
| c-statistic (95% CI) | 0.71 (0.65, 0.76)                                                                    | 0.70 (0.64, 0.76) | 0.81 (0.72, 0.90)                                                               | 0.82 (0.74, 0.90) |
| Optimal threshold    | ≥ 16.6 kPa                                                                           | ≥ 0.90            | ≥ 30.7 kPa                                                                      | ≥ 0.72            |
| Sensitivity          | 58% (55/95)                                                                          | 55% (52/95)       | 74% (17/23)                                                                     | 87% (20/23)       |
| Specificity          | 76% (407/534)                                                                        | 81% (431/534)     | 79% (535/678)                                                                   | 64% (433/678)     |
| PPV                  | 30% (55/182)                                                                         | 34% (52/155)      | 11% (17/160)                                                                    | 8% (20/265)       |
| NPV                  | 91% (407/447)                                                                        | 91% (431/474)     | 99% (535/541)                                                                   | 99% (433/436)     |

NPV, negative predictive value; PPV, positive predictive value; VCTE, vibration-controlled transient elastography.

\* Analysis restricted to patients with complete data for calculation of the Agile scores.

**Supplemental Table 6.** Univariable and multivariable predictors for the development of liver-related events among patients with baseline cirrhosis (F4) secondary to non-alcoholic steatohepatitis

|                                                     | Univariable              |         | Multivariable            |         |
|-----------------------------------------------------|--------------------------|---------|--------------------------|---------|
|                                                     | Hazard Ratio<br>(95% CI) | p-value | Hazard Ratio<br>(95% CI) | p-value |
| Age, per yr                                         | 1.05 (1.00, 1.11)        | 0.0644  | 1.06 (1.00, 1.13)        | 0.0533  |
| Sex (Female vs. Male)                               | 2.08 (0.84, 5.15)        | 0.1142  | 2.39 (0.95, 5.98)        | 0.0637  |
| Ethnicity (Non-hispanic/Latino vs. Hispanic/Latino) | 0.86 (0.30, 2.48)        | 0.7772  | 0.82 (0.28, 2.39)        | 0.7175  |
| BMI, per kg/m <sup>2</sup>                          | 0.98 (0.92, 1.03)        | 0.4082  | 0.97 (0.91, 1.03)        | 0.3431  |
| LS by VCTE $\geq$ 30.7 kPa                          | 8.24 (3.61, 18.8)        | <0.001  | 10.13 (4.38, 23.41)      | <.0001  |

BMI, body mass index; LS by VCTE, liver stiffness by vibration-controlled transient elastography.

**Supplemental Table 7.** Univariable and multivariable predictors for the development of liver-related events among patients with baseline cirrhosis (F4) secondary to non-alcoholic steatohepatitis

|                                                     | Univariable              |         | Multivariable            |         |
|-----------------------------------------------------|--------------------------|---------|--------------------------|---------|
|                                                     | Hazard Ratio<br>(95% CI) | p-value | Hazard Ratio<br>(95% CI) | p-value |
| Age, per yr                                         | 1.05 (1.00, 1.11)        | 0.0644  | 1.06 (1.00, 1.13)        | 0.0512  |
| Sex (Female vs. Male)                               | 2.08 (0.84, 5.15)        | 0.1142  | 2.37 (0.94, 5.96)        | 0.0661  |
| Ethnicity (Non-hispanic/Latino vs. Hispanic/Latino) | 0.86 (0.30, 2.48)        | 0.7772  | 0.80 (0.27, 2.35)        | 0.6911  |
| BMI, per kg/m <sup>2</sup>                          | 0.98 (0.92, 1.03)        | 0.4082  | 0.97 (0.92, 1.03)        | 0.3642  |
| LS by VCTE $\geq$ 30.7 kPa                          | 8.24 (3.61, 18.8)        | <0.001  | 10.13 (4.38, 23.41)      | <0.001  |
| Weight loss $\geq$ 5% (yes vs no)                   | 0.46 (0.11, 1.93)        | 0.2852  | 0.45 (0.11, 1.89)        | 0.2729  |

BMI, body mass index; LS by VCTE, liver stiffness by vibration-controlled transient elastography.

**Supplemental Table 8.** Univariable and multivariable predictors for the development of ascites, hepatic encephalopathy and portal hypertension-related bleeding among patients with baseline cirrhosis (F4) secondary to non-alcoholic steatohepatitis

|                                                     | Univariable              |         | Multivariable            |         |
|-----------------------------------------------------|--------------------------|---------|--------------------------|---------|
|                                                     | Hazard Ratio<br>(95% CI) | p-value | Hazard Ratio<br>(95% CI) | p-value |
| Age, per yr                                         | 1.06 (1.00, 1.12)        | 0.0655  | 1.06 (1.00, 1.14)        | 0.0603  |
| Sex (Female vs. Male)                               | 2.13 (0.79, 5.75)        | 0.1338  | 2.46 (0.90, 6.72)        | 0.0780  |
| Ethnicity (Non-hispanic/Latino vs. Hispanic/Latino) | 0.99 (0.30, 3.34)        | 0.9920  | 0.96 (0.28, 3.25)        | 0.9446  |
| BMI, per kg/m <sup>2</sup>                          | 0.97 (0.91, 1.04)        | 0.3773  | 0.97 (0.91, 1.04)        | 0.3505  |
| LS by VCTE $\geq$ 30.7 kPa                          | 7.90 (3.25, 19.20)       | <.0001  | 9.77 (3.97, 24.05)       | <.0001  |

BMI, body mass index; LS by VCTE, liver stiffness by vibration-controlled transient elastography.



**Supplemental Table 9.** Univariable and multivariable predictors for the development of liver-related events among patients with baseline cirrhosis (F4) secondary to non-alcoholic steatohepatitis

|                                                          | Univariable              |           | Multivariable            |           |
|----------------------------------------------------------|--------------------------|-----------|--------------------------|-----------|
|                                                          | Hazard Ratio<br>(95% CI) | p-value   | Hazard Ratio<br>(95% CI) | p-value   |
| Baseline LS by VCTE $\geq$ 30.7 kPa<br>vs. $<$ 30.7 kPa  | 8.24 (3.61, 18.82)       | $<$ 0.001 | 10.04 (4.34, 23.23)      | $<$ 0.001 |
| Age, per yr                                              | 1.05 (1.00, 1.11)        | 0.0644    | 1.06 (1.00, 1.13)        | 0.0508    |
| Sex (Female vs. Male)                                    | 2.08 (0.84, 5.15)        | 0.1142    | 2.35 (0.94, 5.91)        | 0.0686    |
| Ethnicity (Non-hispanic/Latino<br>vs. Hispanic/Latino)   | 0.86 (0.30, 2.48)        | 0.7772    | 0.84 (0.29, 2.45)        | 0.7446    |
| BMI, per kg/m <sup>2</sup>                               | 0.98 (0.92, 1.03)        | 0.4082    | 0.97 (0.91, 1.03)        | 0.3511    |
| $\geq$ 20% increase in LS by VCTE vs<br>$<$ 20% increase | 0.61 (0.21, 1.76)        | 0.3618    | 0.75 (0.26, 2.18)        | 0.5959    |

BMI, body mass index; LS by VCTE, liver stiffness by vibration-controlled transient elastography.

**Supplemental Table 10.** Univariable and multivariable predictors of liver-related events among patients with cirrhosis (F4) secondary to non-alcoholic steatohepatitis

|                                                     | Univariable              |         | Multivariable            |         |
|-----------------------------------------------------|--------------------------|---------|--------------------------|---------|
|                                                     | Hazard Ratio<br>(95% CI) | p-value | Hazard Ratio<br>(95% CI) | p-value |
| Age, per yr                                         | 1.03 (0.98, 1.09)        | 0.2379  | 1.02 (0.96, 1.08)        | 0.5509  |
| Sex (Female vs. Male)                               | 2.11 (0.78, 5.69)        | 0.1390  | 1.90 (0.70, 5.18)        | 0.2094  |
| Ethnicity (Non-hispanic/Latino vs. Hispanic/Latino) | 1.55 (0.36, 6.62)        | 0.5523  | 1.75 (0.41, 7.49)        | 0.4532  |
| BMI, per kg/m <sup>2</sup>                          | 0.96 (0.90, 1.03)        | 0.2405  | 0.95 (0.89, 1.01)        | 0.1054  |
| Agile 4 score $\geq$ 0.72                           | 11.48 (3.41, 38.65)      | <.0001  | 11.84 (3.51, 39.99)      | <.0001  |

BMI, body mass index.

**Supplemental Table 11.** Concordance statistics by logistic regression for baseline LS by VCTE and baseline NITs in predicting liver-related events

| <b>NIT</b> | <b>Number of participants</b> | <b>c-statistic (95% CI) of NIT</b> | <b>c-statistic (95% CI) of LS by VCTE</b> | <b>Difference</b>   | <b>p-value</b> |
|------------|-------------------------------|------------------------------------|-------------------------------------------|---------------------|----------------|
| FIB-4      | 728                           | 0.76 ( 0.66, 0.86)                 | 0.76 ( 0.65, 0.87)                        | 0.00 (-0.15, 0.15)  | 0.9685         |
| NFS        | 732                           | 0.70 ( 0.60, 0.80)                 | 0.77 ( 0.66, 0.87)                        | -0.07 (-0.23, 0.10) | 0.4336         |
| ELF        | 733                           | 0.80 ( 0.71, 0.89)                 | 0.77 ( 0.67, 0.87)                        | 0.03 (-0.07, 0.14)  | 0.5340         |

LS, liver stiffness; VCTE, vibration-controlled transient elastography; NIT, non-invasive tests; Fibrosis-4 index, FIB-4, NAFLD fibrosis score, NFS; Enhanced Liver Fibrosis test, ELF

**Supplemental Table 12.** Multivariable predictors of liver-related events among patients with advanced fibrosis (F3-F4) secondary to non-alcoholic steatohepatitis

|                                                      | <b>Multivariable</b>        |                |
|------------------------------------------------------|-----------------------------|----------------|
|                                                      | <b>Adjusted HR (95% CI)</b> | <b>p-value</b> |
| Age                                                  | 1.05 (1.00, 1.11)           | 0.0466         |
| Sex (Female vs. Male)                                | 1.63 (0.77, 3.46)           | 0.2027         |
| Ethnicity (Non-hispanic/ Latino vs. Hispanic/Latino) | 0.68 (0.26, 1.81)           | 0.4417         |
| BMI                                                  | 0.98 (0.93, 1.04)           | 0.5266         |
| LS by VCTE $\geq$ 30.7 kPa vs. $<$ 30.7 kPa          | 10.52 (5.15, 21.48)         | $<$ .0001      |
| Treatment arm                                        |                             |                |
| Selonsertib 6 mg vs Placebo                          | 2.34 (0.67, 8.15)           | 0.1815         |
| Selonsertib 18 mg vs Placebo                         | 1.35 (0.36, 5.01)           | 0.6574         |
| Simtuzumab low dose vs Placebo                       | 3.77 (0.38, 37.12)          | 0.2556         |
| Simtuzumab high dose vs Placebo                      | 2.53 (0.26, 24.47)          | 0.4213         |

BMI, body mass index; LS, liver stiffness; VCTE, vibration-controlled transient elastography

**Supplemental Table 13.** Performance of liver stiffness by vibration-controlled transient elastography according to thresholds recommended by the Baveno VII consensus for identification of patients with advanced chronic liver disease <sup>25</sup>

| Threshold                                                                            | Proportion with Event | Sensitivity, % (95% CI) | Specificity, % (95% CI) | PPV, % (95% CI) | NPV, % (95% CI) | Hazard Ratio (95% CI) |
|--------------------------------------------------------------------------------------|-----------------------|-------------------------|-------------------------|-----------------|-----------------|-----------------------|
| <b>Progression to Cirrhosis (F4) in Patients with Bridging Fibrosis (F3) (n=664)</b> |                       |                         |                         |                 |                 |                       |
| LS ≥ 10 kPa                                                                          | 91/483 (19%)          | 88 (81, 94)             | 30 (26, 34)             | 19 (15, 23)     | 93 (89, 97)     | 3.01 (1.65, 5.50)     |
| LS < 10 kPa                                                                          | 12/181 (7%)           |                         |                         |                 |                 |                       |
| LS ≥ 15 kPa*                                                                         | 64/240 (27%)          | 62 (52, 72)             | 69 (65, 72)             | 27 (21, 33)     | 91 (88, 93)     | 3.21 (2.16, 4.79)     |
| LS < 15 kPa                                                                          | 39/424 (9%)           |                         |                         |                 |                 |                       |
| LS ≥ 20 kPa                                                                          | 34/112 (30%)          | 33 (24, 43)             | 86 (83, 89)             | 30 (22, 40)     | 88 (84, 90)     | 2.70 (1.79, 4.08)     |
| LS < 20 kPa                                                                          | 69/552 (13%)          |                         |                         |                 |                 |                       |
| LS ≥ 25 kPa                                                                          | 25/52 (48%)           | 24 (16, 34)             | 95 (93, 97)             | 48 (34, 62)     | 87 (84, 90)     | 4.52 (2.88, 7.10)     |
| LS < 25 kPa                                                                          | 78/612 (13%)          |                         |                         |                 |                 |                       |
| LS ≥ 30 kPa                                                                          | 17/32 (53%)           | 17 (10, 25)             | 97 (96, 98)             | 53 (35, 71)     | 86 (83, 89)     | 4.54 (2.69, 7.64)     |
| LS < 30 kPa                                                                          | 86/632 (14%)          |                         |                         |                 |                 |                       |
| LS ≥ 35 kPa                                                                          | 9/20 (45%)            | 9 (4, 16)               | 98 (97, 99)             | 45 (23, 68)     | 85 (82, 88)     | 3.45 (1.74, 6.83)     |
| LS < 35 kPa                                                                          | 94/644 (15%)          |                         |                         |                 |                 |                       |
| <b>Liver-Related Events in Patients with Cirrhosis (F4) (n=734)</b>                  |                       |                         |                         |                 |                 |                       |
| LS ≥ 10 kPa                                                                          | 26/672 (4%)           | 96 (81, 100)            | 9 (7, 11)               | 4 (3, 6)        | 98 (91, 100)    | 2.46 (0.33, 18.10)    |
| LS < 10 kPa                                                                          | 1/62 (2%)             |                         |                         |                 |                 |                       |
| LS ≥ 15 kPa                                                                          | 25/532 (5%)           | 93 (76, 99)             | 28 (25, 32)             | 5 (3, 7)        | 99 (96, 100)    | 4.92 (1.17, 20.78)    |
| LS < 15 kPa                                                                          | 2/202 (1%)            |                         |                         |                 |                 |                       |
| LS ≥ 20 kPa                                                                          | 22/400 (6%)           | 81 (62, 94)             | 47 (43, 50)             | 6 (3, 8)        | 99 (97, 100)    | 3.83 (1.45, 10.12)    |
| LS < 20 kPa                                                                          | 5/334 (1%)            |                         |                         |                 |                 |                       |
| LS ≥ 25 kPa                                                                          | 21/268 (8%)           | 78 (58, 91)             | 65 (0.61, 0.69)         | 8 (5, 12)       | 99 (97, 100)    | 6.43 (2.60, 15.94)    |
| LS < 25 kPa                                                                          | 6/466 (1%)            |                         |                         |                 |                 |                       |
| LS ≥ 30 kPa*                                                                         | 19/177 (11%)          | 70 (50, 86)             | 78 (74, 81)             | 11 (7, 16)      | 99 (97, 99)     | 7.87 (3.44, 17.98)    |
| LS < 30 kPa                                                                          | 8/557 (1%)            |                         |                         |                 |                 |                       |
| LS ≥ 35 kPa                                                                          | 16/127 (13%)          | 59 (39, 78)             | 84 (81, 87)             | 13 (7, 20)      | 98 (97, 99)     | 7.44 (3.45, 16.03)    |
| LS < 35 kPa                                                                          | 11/607 (2%)           |                         |                         |                 |                 |                       |

NPV, negative predictive value; PPV, positive predictive value; LS, liver stiffness by vibration-controlled transient elastography. 95% CI for sensitivity, specificity, PPV, and NPV are based on exact limits. \* Optimal threshold based on maximal sum of sensitivity and specificity.

**Supplemental Figure 1.**  $\geq 5$ kPA (and  $\geq 20\%$ ) increase in Liver stiffness (LS) by vibration-controlled transient elastography (VCTE) is associated with increased risk of progression to cirrhosis among patients with baseline bridging (F3) fibrosis secondary to non-alcoholic steatohepatitis

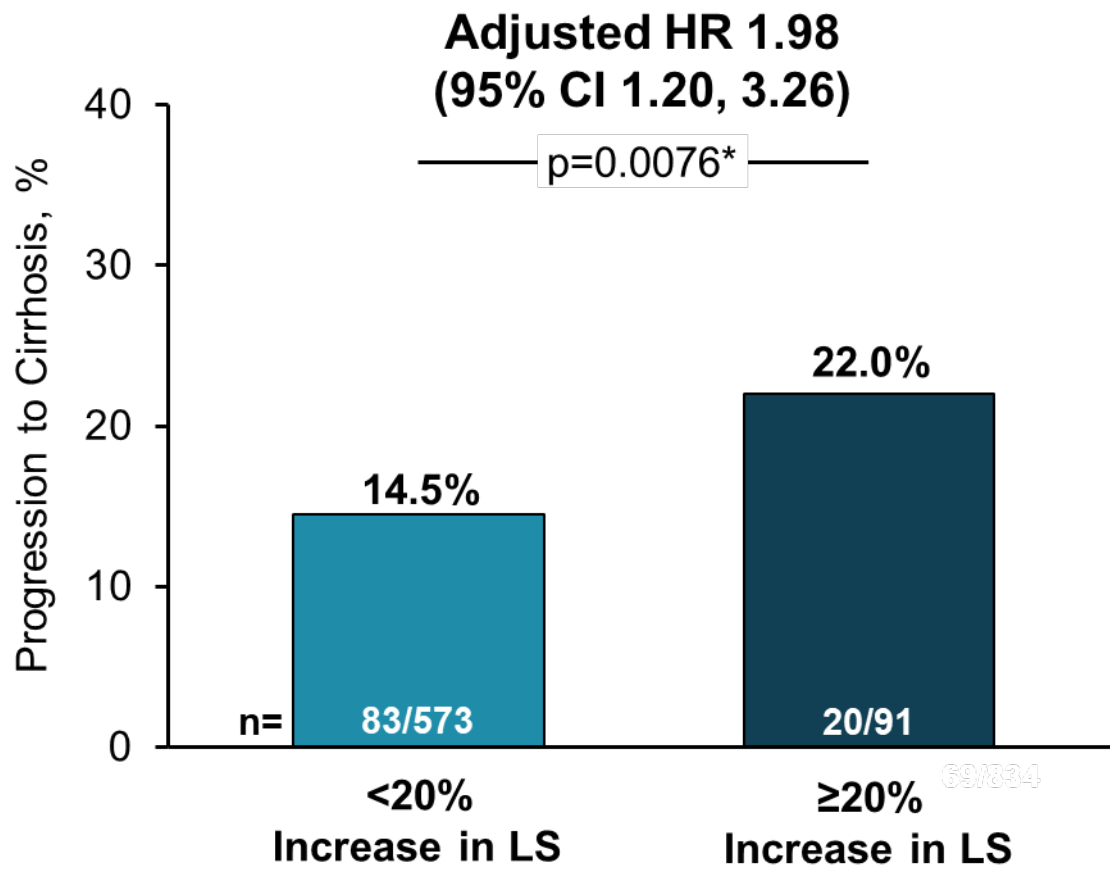

**Supplemental Figure 2.** Progression to cirrhosis in patients with bridging (F3) fibrosis secondary to non-alcoholic steatohepatitis, stratified by  $\geq 5$ kPA (and  $\geq 20\%$ ) increase in Liver stiffness (LS) by vibration-controlled transient elastography (VCTE)

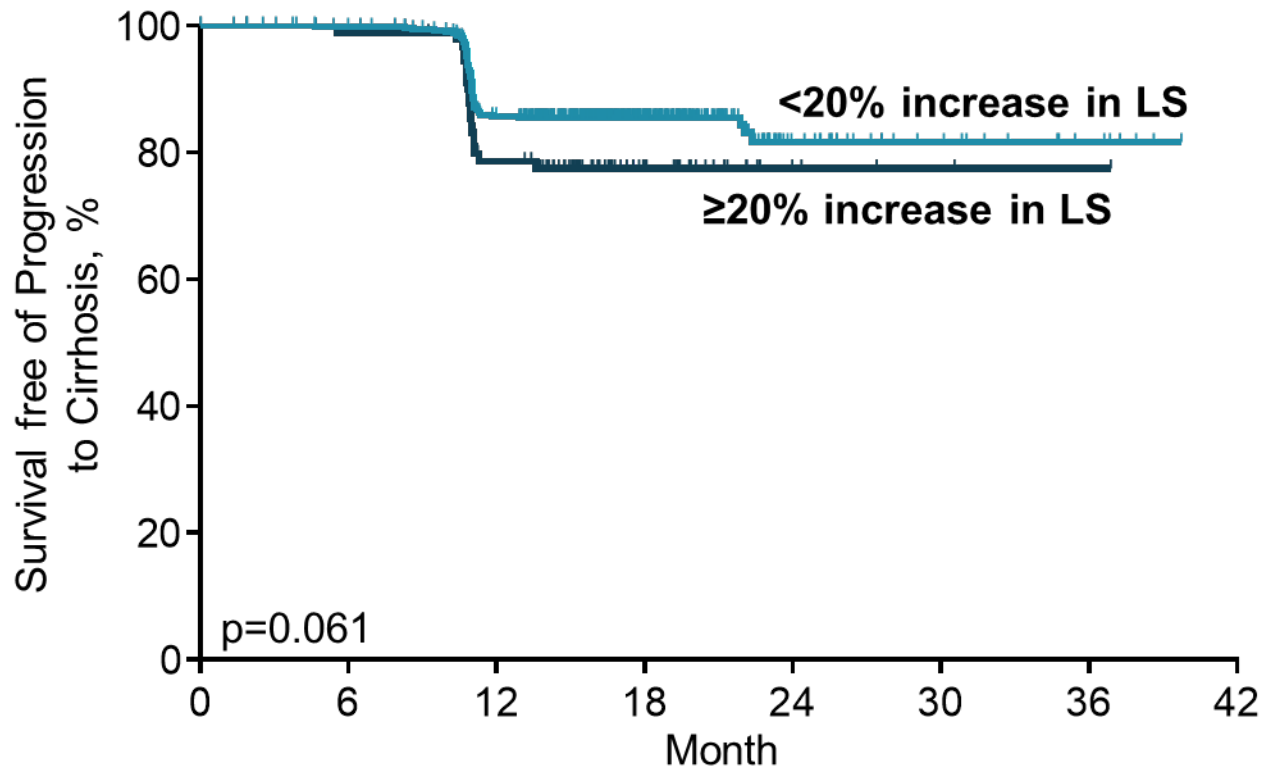

| n at risk (events) |         | 0       | 6        | 12       | 18      | 24      | 30     | 36     | 42     |
|--------------------|---------|---------|----------|----------|---------|---------|--------|--------|--------|
| <20%               | 573 (0) | 559 (1) | 470 (79) | 178 (80) | 30 (83) | 14 (83) | 6 (83) | 0 (83) | 0 (83) |
| $\geq 20\%$        | 91 (0)  | 89 (1)  | 69 (19)  | 27 (20)  | 4 (20)  | 2 (20)  | 1 (20) | 0 (20) | 0 (20) |

**Supplemental Figure 3.** Progression to cirrhosis in patients with bridging (F3) fibrosis secondary to non-alcoholic steatohepatitis, stratified by Agile 3+ score  $\geq 0.90$  versus  $< 0.90$

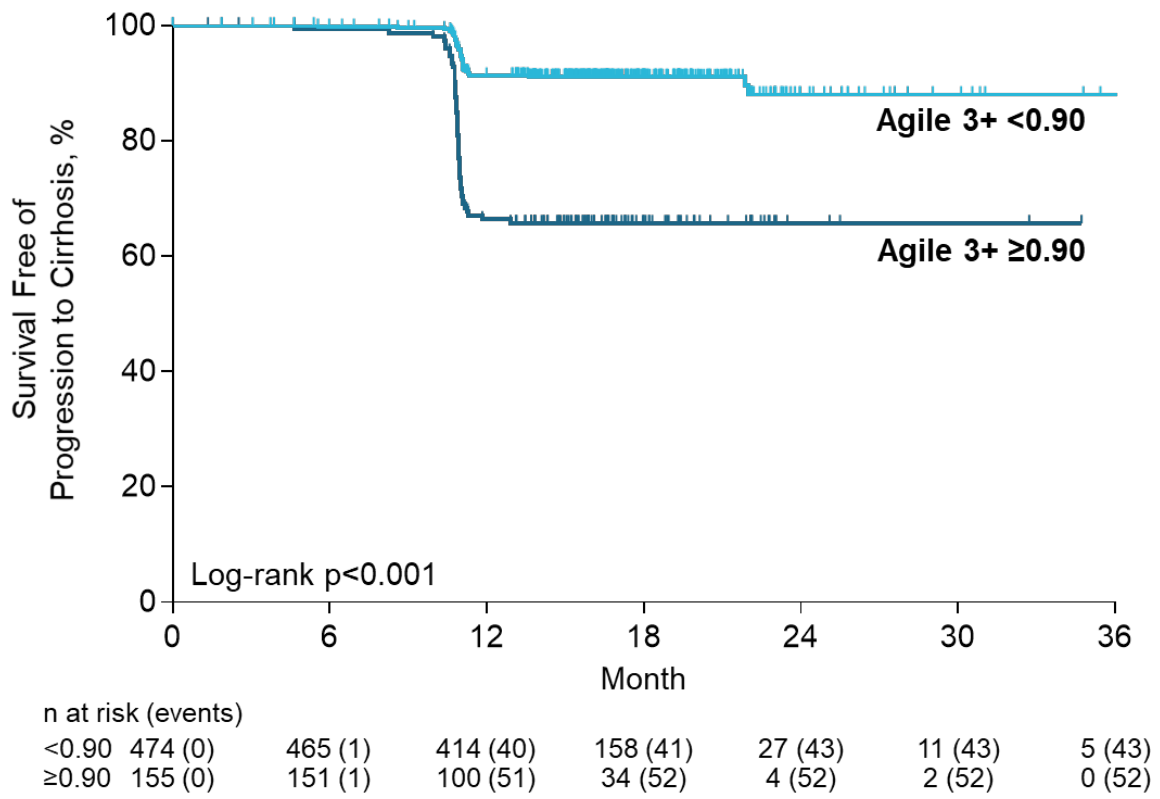



**Supplemental Figure 4.** Liver-related events in patients with cirrhosis (F4) secondary to non-alcoholic steatohepatitis, stratified by  $\geq 5$ kPA (and  $\geq 20\%$ ) increase in Liver stiffness (LS) by vibration-controlled transient elastography (VCTE)

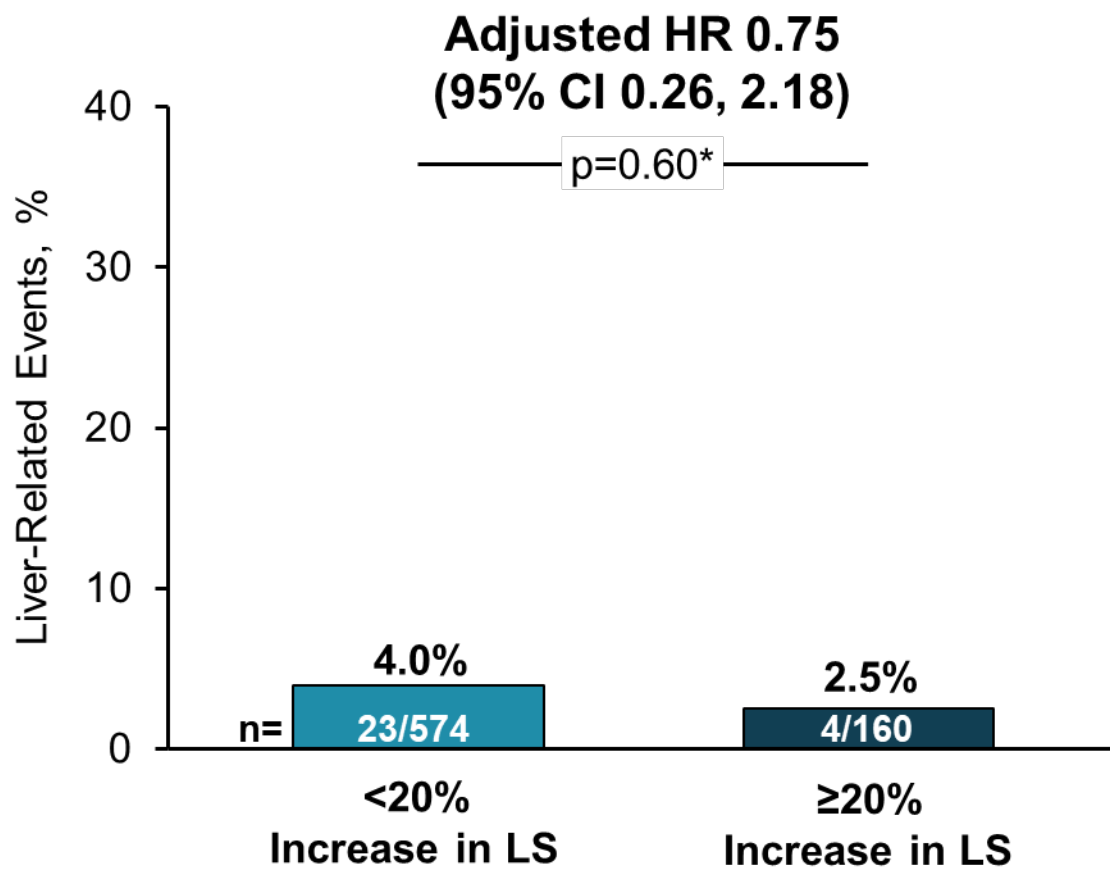

\*Fisher exact test.

**Supplemental Figure 5.** Liver-related events in patients with cirrhosis (F4) secondary to non-alcoholic steatohepatitis, stratified by  $\geq 5$ kPA (and  $\geq 20\%$ ) increase in Liver stiffness (LS) by vibration-controlled transient elastography (VCTE)

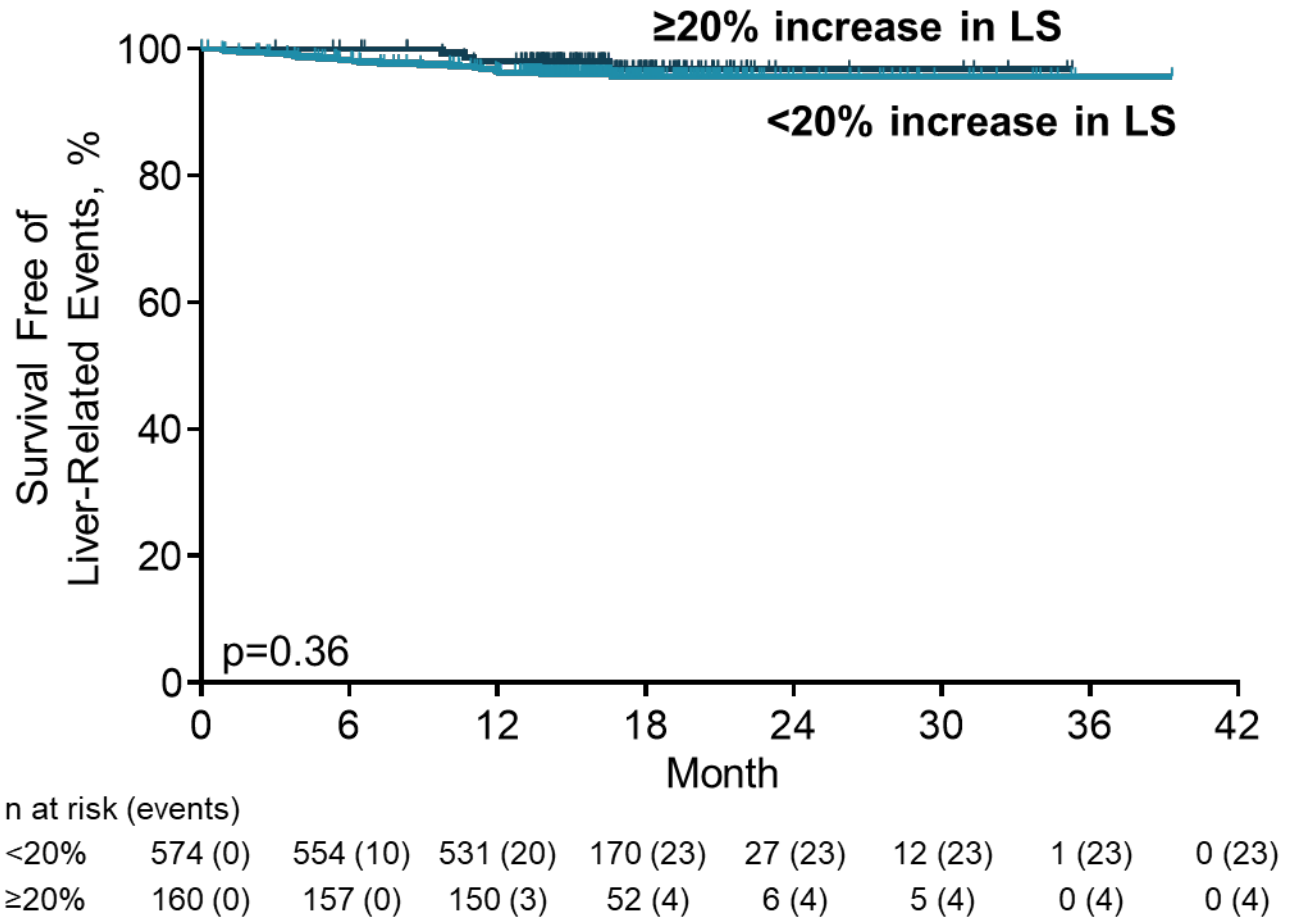

**Supplemental Figure 6.** Liver-related events in patients with cirrhosis (F4) secondary to non-alcoholic steatohepatitis, stratified by Agile 4  $\geq 0.72$  versus  $< 0.72$

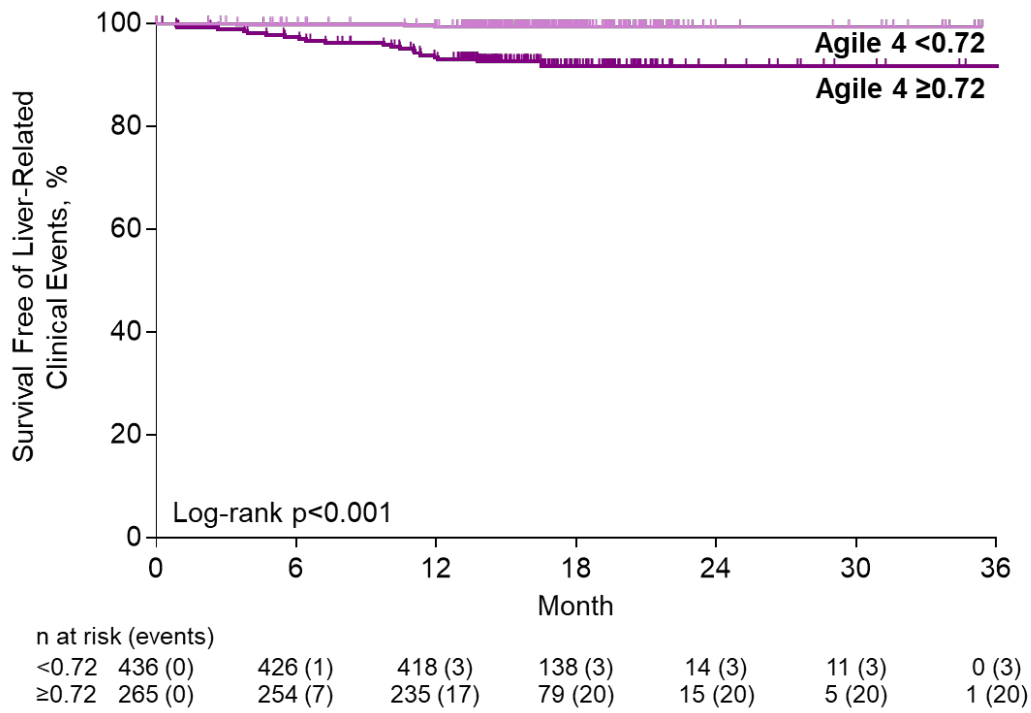

Supplement: NIHMS1835409-supplement-Supp1.pdf [file NIHMS1835409-supplement-Supp1.pdf]
